# Supplementary material for: A rapid screening classifier for diagnosing COVID-19
Source: Int J Biol Sci. 2021 Jan 9;17(2):539–48. doi: 10.7150/ijbs.53982 (PMC7893593; doi:10.7150/ijbs.53982)
Supplement: Supplementary file 1 — Supplementary table S1. [file ijbsv17p0539s1.pdf]

## Supplementary Materials

**Table S1 Relative coefficients of each clinic feature in deep learning model.**

| Clinic features              | Relative coefficients | Clinic features                            | Relative coefficients |
|------------------------------|-----------------------|--------------------------------------------|-----------------------|
| Fever on admission           | -0.072                | Cough                                      | -0.0068               |
| Urea Nitrogen                | -0.0707               | Chills during hospitalization              | -0.0019               |
| Procalcitonin                | -0.0632               | Activated partial thromboplastin time      | -0.0017               |
| Lung disease                 | -0.0579               | Myalgia                                    | 0.0002                |
| C-reactive protein           | -0.0571               | Hypertension                               | 0.0003                |
| Liver Disease                | -0.0513               | Highest temperature during hospitalization | 0.0004                |
| White blood cell count       | -0.0448               | Heart disease                              | 0.0023                |
| Rash                         | -0.0445               | Cancer                                     | 0.0035                |
| Expectoration                | -0.0439               | Diabetes                                   | 0.0068                |
| Sore throat                  | -0.0423               | Aspartate aminotransferase                 | 0.0081                |
| Hemoptysis                   | -0.0389               | Serum chlorine                             | 0.0081                |
| Septic shock                 | -0.0349               | Pharyngeal congestion                      | 0.0113                |
| Impaired immune system       | -0.0345               | Chills on admission                        | 0.0156                |
| Fever during hospitalization | -0.0312               | Enlarged tonsils                           | 0.0162                |
| Kidney disease               | -0.0248               | Serum potassium                            | 0.0189                |
| Prothrombin time             | -0.023                | Highest temperature on admission           | 0.02                  |
| D-dimer                      | -0.0224               | Serum sodium                               | 0.0249                |
| Alanine aminotransferase     | -0.0219               | Headache                                   | 0.0267                |
| Lymphocyte count             | -0.0172               | Acute kidney injury                        | 0.0281                |
| Creatinine                   | -0.0146               | Nausea / Vomit                             | 0.0283                |

|                                     |         |                                        |        |
|-------------------------------------|---------|----------------------------------------|--------|
| Acute respiratory distress syndrome | -0.0115 | Platelet count                         | 0.0307 |
| Hemoglobin                          | -0.0109 | Rhabdomyolysis                         | 0.0338 |
| Serum calcium                       | -0.0102 | Conjunctival congestion                | 0.0374 |
| Nasal congestion                    | -0.0097 | Disseminated intravascular coagulation | 0.0377 |
| Enlarged lymph node                 | -0.0095 | Obesity                                | 0.0436 |
| Fatigue                             | -0.0088 | Lactate dehydrogenase                  | 0.0529 |

**Footnote:** Huger absolute value means more important in model, and minus value means negative correlation and vice versa.
